# Supplementary material for: An eight-mRNA signature outperforms the lncRNA-based signature in predicting prognosis of patients with glioblastoma
Source: BMC Med Genet. 2020 Mar 19;21:56. doi: 10.1186/s12881-020-0992-7 (PMC7081624; doi:10.1186/s12881-020-0992-7)
Supplement: Supplementary file 1 — Additional file 1. [file 12881_2020_992_MOESM1_ESM.xlsx]

## Sheet: Sheet1
Gene	Ensembl_ID	Type	logFC	Pvalue	FDR
KRT2	ENSG00000172867.3	coding	-1.77851	1.15e-09	2.48e-07
DEFA4	ENSG00000164821.4	coding	-1.74195	9.17e-11	3.07e-08
GGTLC2	ENSG00000100121.11	coding	-1.6151	2.82e-08	3e-06
PGPEP1L	ENSG00000183571.9	coding	-1.58598	1.61e-09	3.1e-07
KLK5	ENSG00000167754.11	coding	-1.56962	2.48e-08	2.67e-06
LCN9	ENSG00000148386.8	coding	-1.55994	5.63e-11	2.11e-08
KRT79	ENSG00000185640.5	coding	-1.55515	7.4e-07	4.49e-05
SPATA19	ENSG00000166118.6	coding	-1.55345	1.55e-07	1.19e-05
COL6A5	ENSG00000172752.13	coding	-1.51285	4.75e-06	0.000225
HAPLN4	ENSG00000187664.8	coding	-1.46052	7.3e-07	4.46e-05
TRIM10	ENSG00000204613.9	coding	-1.45874	2.5e-05	0.000704
UTS2R	ENSG00000181408.3	coding	-1.45424	7.17e-08	6.61e-06
GLYAT	ENSG00000149124.9	coding	-1.44688	4.27e-07	2.9e-05
FCN2	ENSG00000160339.14	coding	-1.43709	1.51e-06	8.63e-05
KRT13	ENSG00000171401.13	coding	-1.38915	9.23e-06	0.000364
RGSL1	ENSG00000121446.16	coding	-1.38155	7.95e-05	0.00179
NLRP7	ENSG00000167634.11	coding	-1.3746	3.61e-05	0.000962
SERPINB7	ENSG00000166396.11	coding	-1.37363	2.09e-05	0.000613
ADGB	ENSG00000118492.15	coding	-1.3495	2.26e-05	0.000651
ASIC5	ENSG00000256394.2	coding	-1.3412	1.89e-05	0.000577
PAEP	ENSG00000122133.15	coding	-1.34041	3.51e-06	0.000171
BSND	ENSG00000162399.6	coding	-1.31624	0.000134	0.00274
TMPRSS11F	ENSG00000198092.5	coding	-1.30053	6.67e-05	0.00155
NKX6-3	ENSG00000165066.12	coding	-1.28731	0.000145	0.00293
PAX9	ENSG00000198807.11	coding	-1.28336	1.31e-05	0.00045
TMEM89	ENSG00000183396.3	coding	-1.28319	1.21e-05	0.000425
RNF17	ENSG00000132972.17	coding	-1.28285	0.000244	0.00448
FABP12	ENSG00000197416.4	coding	-1.2821	9.56e-06	0.000375
LY6G6D	ENSG00000244355.6	coding	-1.27715	1.14e-05	0.000408
CYP4Z1	ENSG00000186160.4	coding	-1.27531	0.00011	0.00234
SOST	ENSG00000167941.2	coding	-1.27313	5.17e-06	0.000241
HSFX1	ENSG00000171116.7	coding	-1.27028	1.94e-05	0.000587
CGB7	ENSG00000196337.9	coding	-1.26776	9.58e-06	0.000375
SLC22A25	ENSG00000196600.11	coding	-1.26307	0.000186	0.00363
FGG	ENSG00000171557.15	coding	-1.2617	0.0001	0.00216
TNS4	ENSG00000131746.11	coding	-1.26091	9.22e-05	0.00203
KIF12	ENSG00000136883.11	coding	-1.25946	2.61e-05	0.000733
FAM9B	ENSG00000177138.14	coding	-1.25814	0.000937	0.0126
TPH2	ENSG00000139287.11	coding	-1.25727	0.000194	0.00374
SPERT	ENSG00000174015.8	coding	-1.25284	0.000292	0.00519
HTR1E	ENSG00000168830.7	coding	-1.25115	3.03e-05	0.00083
GALR3	ENSG00000128310.2	coding	-1.25026	6.13e-06	0.000265
BHLHA9	ENSG00000205899.3	coding	-1.24408	0.000213	0.00404
GJD3	ENSG00000183153.6	coding	-1.24312	0.00013	0.00268
AQP2	ENSG00000167580.6	coding	-1.23928	0.000311	0.00546
LYZL4	ENSG00000157093.7	coding	-1.23659	0.000213	0.00404
CLDN16	ENSG00000113946.3	coding	-1.2357	2.87e-05	0.000793
LMAN1L	ENSG00000140506.15	coding	-1.23564	0.000693	0.00994
CLRN1	ENSG00000163646.9	coding	-1.23421	0.000345	0.00594
NXNL1	ENSG00000171773.2	coding	-1.23327	0.000151	0.00303
GATA5	ENSG00000130700.6	coding	-1.23307	0.000572	0.00884
HTR3B	ENSG00000149305.5	coding	-1.23045	0.000172	0.00339
SERPINA10	ENSG00000140093.8	coding	-1.22399	0.00113	0.0146
NKX2-8	ENSG00000136327.6	coding	-1.22243	8.39e-05	0.00186
GOLGA6B	ENSG00000215186.6	coding	-1.21885	0.000244	0.00449
ZAN	ENSG00000146839.17	coding	-1.21316	0.000769	0.0108
NR0B2	ENSG00000131910.4	coding	-1.21312	0.000254	0.00465
GPR25	ENSG00000170128.3	coding	-1.21261	0.000317	0.00556
APOF	ENSG00000175336.9	coding	-1.20774	6.67e-05	0.00155
SAA4	ENSG00000148965.7	coding	-1.20567	9.73e-05	0.00213
KLK2	ENSG00000167751.11	coding	-1.20053	0.00274	0.0273
TMEM190	ENSG00000160472.4	coding	-1.19957	0.00014	0.00286
IL25	ENSG00000166090.8	coding	-1.19904	7.55e-05	0.00171
SLC15A5	ENSG00000188991.3	coding	-1.1959	0.000128	0.00267
ARL14EPL	ENSG00000268223.2	coding	-1.19581	3.71e-05	0.00098
SDR16C5	ENSG00000170786.11	coding	-1.19396	3.08e-05	0.000838
NPAP1	ENSG00000185823.3	coding	-1.192	0.00284	0.028
GOLGA8G	ENSG00000183629.12	coding	-1.19138	0.00294	0.0287
LOXHD1	ENSG00000167210.15	coding	-1.19087	0.00028	0.00499
SLC2A2	ENSG00000163581.12	coding	-1.18848	0.000435	0.00702
KLF14	ENSG00000266265.2	coding	-1.18841	0.00137	0.0161
KLHL1	ENSG00000150361.10	coding	-1.18688	0.000154	0.00308
C17orf99	ENSG00000187997.10	coding	-1.18583	0.000491	0.00784
TRIM31	ENSG00000204616.9	coding	-1.18407	0.000359	0.00608
SLC22A13	ENSG00000172940.10	coding	-1.18075	0.00023	0.00431
ANKS4B	ENSG00000175311.6	coding	-1.17809	0.00143	0.0167
BRS3	ENSG00000102239.4	coding	-1.17439	0.000203	0.00389
WNT1	ENSG00000125084.10	coding	-1.16437	0.000142	0.0029
FATE1	ENSG00000147378.10	coding	-1.16393	0.000132	0.00271
LOR	ENSG00000203782.5	coding	-1.16185	0.000528	0.00828
PLA2G4D	ENSG00000159337.6	coding	-1.16138	0.000518	0.00819
MUC22	ENSG00000261272.1	coding	-1.15995	0.00224	0.0235
UTS2	ENSG00000049247.12	coding	-1.15988	0.000305	0.00537
REN	ENSG00000143839.13	coding	-1.15754	0.0017	0.0192
CRLF2	ENSG00000205755.9	coding	-1.15646	0.000671	0.00979
KRT31	ENSG00000094796.4	coding	-1.1538	0.000972	0.013
EIF4E1B	ENSG00000175766.10	coding	-1.15183	0.00018	0.00352
CYP7A1	ENSG00000167910.3	coding	-1.15031	0.000352	0.006
OTOR	ENSG00000125879.4	coding	-1.15006	0.000988	0.0131
MAS1	ENSG00000130368.5	coding	-1.14768	0.000356	0.00605
OR2B11	ENSG00000177535.7	coding	-1.14755	0.000545	0.00852
CBLC	ENSG00000142273.9	coding	-1.14651	0.000525	0.00827
CFC1	ENSG00000136698.7	coding	-1.13917	0.0011	0.0144
CST2	ENSG00000170369.3	coding	-1.13902	0.000851	0.0118
OBP2B	ENSG00000171102.13	coding	-1.13807	0.000603	0.00926
EFCAB3	ENSG00000172421.6	coding	-1.1364	0.00267	0.0268
AGR3	ENSG00000173467.7	coding	-1.13372	6.03e-05	0.00142
THEG	ENSG00000105549.9	coding	-1.13344	0.00124	0.0153
KLK4	ENSG00000167749.10	coding	-1.1322	0.0011	0.0144
MRGPRE	ENSG00000184350.9	coding	-1.12817	0.000677	0.00979
PNPLA5	ENSG00000100341.10	coding	-1.12804	0.000539	0.00844
STH	ENSG00000256762.1	coding	-1.12705	0.000618	0.00947
FRMD7	ENSG00000165694.8	coding	-1.12427	0.00192	0.021
KLK1	ENSG00000167748.9	coding	-1.11732	0.0003	0.00532
CELF6	ENSG00000140488.13	coding	-1.1146	0.00066	0.00979
KCNU1	ENSG00000215262.6	coding	-1.1125	0.00138	0.0163
CPA1	ENSG00000091704.8	coding	-1.10905	0.00069	0.00991
CRH	ENSG00000147571.4	coding	-1.10518	0.000364	0.0061
LRRC14B	ENSG00000185028.3	coding	-1.1051	0.00106	0.0139
RBMXL2	ENSG00000170748.6	coding	-1.10065	0.00282	0.0279
CALR3	ENSG00000269058.4	coding	-1.09901	0.00184	0.0203
MOGAT2	ENSG00000166391.13	coding	-1.09426	0.00417	0.037
FGF10	ENSG00000070193.4	coding	-1.09292	0.000904	0.0123
PSMB11	ENSG00000222028.3	coding	-1.09071	0.00296	0.0288
ADH1A	ENSG00000187758.6	coding	-1.08795	0.0041	0.0365
CYP4F2	ENSG00000186115.11	coding	-1.08656	0.00114	0.0146
AMIGO3	ENSG00000176020.8	coding	-1.08503	0.00116	0.0148
TRPV5	ENSG00000127412.5	coding	-1.08479	0.000976	0.013
RNF222	ENSG00000189051.5	coding	-1.08333	0.00181	0.02
DDX4	ENSG00000152670.17	coding	-1.08273	0.00154	0.0176
KISS1	ENSG00000170498.8	coding	-1.0825	0.000401	0.0066
KCNK17	ENSG00000124780.12	coding	-1.08026	0.00066	0.00979
SOHLH1	ENSG00000165643.9	coding	-1.07819	0.000446	0.00718
TH	ENSG00000180176.13	coding	-1.0769	0.000883	0.0121
BANF2	ENSG00000125888.13	coding	-1.07669	0.00257	0.026
RIMBP3C	ENSG00000183246.6	coding	-1.07358	0.00207	0.0224
RNF133	ENSG00000188050.2	coding	-1.07113	0.00121	0.0153
PRSS42	ENSG00000178055.11	coding	-1.06654	0.000824	0.0115
HIGD2B	ENSG00000175202.3	coding	-1.06481	0.00233	0.0242
SLC6A5	ENSG00000165970.10	coding	-1.06405	0.00247	0.0252
PAX2	ENSG00000075891.20	coding	-1.06302	0.00114	0.0146
SULT6B1	ENSG00000138068.9	coding	-1.06257	0.00431	0.0379
RESP18	ENSG00000182698.10	coding	-1.05955	0.00201	0.0219
AQP10	ENSG00000143595.11	coding	-1.05845	0.00411	0.0366
TEKT4	ENSG00000163060.7	coding	-1.05842	0.0017	0.0192
ARL5C	ENSG00000141748.11	coding	-1.05809	0.00329	0.0312
MROH9	ENSG00000117501.13	coding	-1.05337	0.00496	0.0427
HBZ	ENSG00000130656.4	coding	-1.05244	0.00144	0.0168
TMC3	ENSG00000188869.11	coding	-1.05194	0.00224	0.0235
PRSS22	ENSG00000005001.8	coding	-1.05187	0.00495	0.0426
APOB	ENSG00000084674.12	coding	-1.05111	0.00203	0.022
SUPT20HL1	ENSG00000223731.2	coding	-1.05082	0.00375	0.0342
KCNB2	ENSG00000182674.5	coding	-1.05065	0.00171	0.0193
VCX3A	ENSG00000169059.11	coding	-1.05062	0.00343	0.032
METTL21C	ENSG00000139780.7	coding	-1.04973	0.00442	0.0386
RAET1L	ENSG00000155918.6	coding	-1.04868	0.00243	0.0251
TMEM215	ENSG00000188133.5	coding	-1.0485	0.00247	0.0252
PAGE5	ENSG00000158639.10	coding	-1.0481	0.00369	0.0338
ANKRD30B	ENSG00000180777.12	coding	-1.04612	0.00492	0.0424
CTXN3	ENSG00000205279.7	coding	-1.0444	0.00215	0.0229
OCA2	ENSG00000104044.14	coding	-1.04296	0.00151	0.0174
FADS6	ENSG00000172782.10	coding	-1.0404	0.00257	0.026
SLCO4C1	ENSG00000173930.8	coding	-1.04006	0.00402	0.0361
RFPL4B	ENSG00000251258.1	coding	-1.03989	0.00386	0.035
ARMS2	ENSG00000254636.1	coding	-1.03739	0.00145	0.0168
ANXA10	ENSG00000109511.9	coding	-1.0355	0.00497	0.0427
PCDH20	ENSG00000280165.1	coding	-1.03507	0.00385	0.035
KRTAP5-8	ENSG00000241233.2	coding	-1.0324	0.00261	0.0263
DRD5	ENSG00000169676.5	coding	-1.03136	0.00273	0.0272
KLK7	ENSG00000169035.10	coding	-1.03033	0.00175	0.0197
TFAP2B	ENSG00000008196.11	coding	-1.02978	0.00144	0.0168
GOLGA8S	ENSG00000261739.2	coding	-1.0255	0.00264	0.0266
PNLIPRP3	ENSG00000203837.4	coding	-1.01945	0.00401	0.0361
PYDC1	ENSG00000169900.6	coding	-1.01878	0.00306	0.0295
NAT8	ENSG00000144035.3	coding	-1.01669	0.00229	0.0239
NEUROD6	ENSG00000164600.5	coding	-1.01646	0.00209	0.0225
CDHR4	ENSG00000187492.7	coding	-1.01548	0.00219	0.0231
OR13J1	ENSG00000168828.5	coding	-1.01529	0.0029	0.0284
SDR9C7	ENSG00000170426.1	coding	-1.01492	0.00367	0.0337
RS1	ENSG00000102104.8	coding	-1.01317	0.00294	0.0287
C1orf210	ENSG00000253313.4	coding	-1.01298	0.00401	0.0361
ALOX12B	ENSG00000179477.8	coding	-1.01203	0.00303	0.0293
F7	ENSG00000057593.12	coding	-1.01044	0.00339	0.0318
C4orf45	ENSG00000164123.6	coding	-1.01008	0.00367	0.0337
SPDYC	ENSG00000204710.2	coding	-1.00815	0.00498	0.0428
KCNA4	ENSG00000182255.6	coding	-1.00753	0.00225	0.0235
CAPSL	ENSG00000152611.10	coding	-1.00617	0.00284	0.028
GALNTL5	ENSG00000106648.12	coding	-1.00592	0.00435	0.0381
HOXB8	ENSG00000120068.6	coding	-1.00529	0.00183	0.0202
ATP12A	ENSG00000075673.10	coding	-1.00295	0.00425	0.0375
TNNT2	ENSG00000118194.17	coding	-1.00275	0.00291	0.0285
EDN2	ENSG00000127129.8	coding	-1.00089	0.00331	0.0313
TCL1A	ENSG00000100721.9	coding	1.00074	0.00455	0.0395
FREM3	ENSG00000183090.5	coding	1.00163	0.00258	0.026
CD1E	ENSG00000158488.14	coding	1.00179	0.00383	0.0348
TNFSF11	ENSG00000120659.13	coding	1.0027	0.00463	0.0401
CLLU1OS	ENSG00000205057.4	coding	1.0046	0.00316	0.0301
ANKRD20A4	ENSG00000172014.12	coding	1.00712	0.00339	0.0318
CPA3	ENSG00000163751.3	coding	1.00732	0.00213	0.0228
OIT3	ENSG00000138315.11	coding	1.00771	0.00297	0.0288
HBM	ENSG00000206177.5	coding	1.01856	0.00184	0.0203
NEUROD4	ENSG00000123307.3	coding	1.02457	0.00188	0.0207
MAGEC2	ENSG00000046774.9	coding	1.02567	0.0033	0.0312
RAD51AP2	ENSG00000214842.5	coding	1.02726	0.00426	0.0376
IFIT1B	ENSG00000204010.3	coding	1.02844	0.00279	0.0277
CCDC63	ENSG00000173093.11	coding	1.03334	0.00433	0.038
LRRC10	ENSG00000198812.4	coding	1.03361	0.00472	0.0408
TSPO2	ENSG00000112212.10	coding	1.03494	0.00169	0.0191
MTNR1B	ENSG00000134640.2	coding	1.05003	0.00363	0.0335
GABRP	ENSG00000094755.15	coding	1.05215	0.00369	0.0338
CD1A	ENSG00000158477.6	coding	1.0534	0.00151	0.0174
HIST1H2BM	ENSG00000273703.1	coding	1.05998	0.00117	0.0148
CYP4F22	ENSG00000171954.11	coding	1.06353	0.00177	0.0197
FOXR1	ENSG00000176302.11	coding	1.06499	0.00146	0.0169
HBG1	ENSG00000213934.5	coding	1.06846	0.00142	0.0166
MS4A10	ENSG00000172689.1	coding	1.07669	0.00331	0.0313
F13B	ENSG00000143278.3	coding	1.07787	0.00457	0.0396
RP1	ENSG00000104237.6	coding	1.07851	0.00387	0.0351
SLC9C1	ENSG00000172139.13	coding	1.07991	0.00114	0.0146
IL23R	ENSG00000162594.13	coding	1.07996	0.00301	0.0292
NKX2-4	ENSG00000125816.4	coding	1.08085	0.00237	0.0246
NCR1	ENSG00000189430.11	coding	1.08664	0.0011	0.0144
KRT32	ENSG00000108759.3	coding	1.08687	0.00322	0.0305
CXCL17	ENSG00000189377.7	coding	1.09002	0.00374	0.0342
HSD17B2	ENSG00000086696.9	coding	1.09019	0.00313	0.0299
ZSCAN4	ENSG00000180532.9	coding	1.09654	0.00144	0.0168
OR4N2	ENSG00000176294.4	coding	1.09882	0.000368	0.00616
TM4SF5	ENSG00000142484.6	coding	1.10657	0.00175	0.0196
PTF1A	ENSG00000168267.5	coding	1.10729	0.0025	0.0254
PRSS48	ENSG00000189099.10	coding	1.1092	0.000344	0.00593
MAGEC1	ENSG00000155495.8	coding	1.12089	0.00223	0.0235
RHOXF2	ENSG00000131721.4	coding	1.1273	0.00152	0.0175
ACER1	ENSG00000167769.4	coding	1.13348	0.000119	0.00252
OR3A1	ENSG00000180090.4	coding	1.13366	0.000752	0.0106
CLEC6A	ENSG00000205846.3	coding	1.13567	0.000881	0.0121
ANKRD20A2	ENSG00000183148.6	coding	1.14656	0.000504	0.00803
ZNF728	ENSG00000269067.1	coding	1.14674	0.0004	0.0066
SLC25A31	ENSG00000151475.5	coding	1.14837	0.000967	0.013
RPS4Y2	ENSG00000280969.1	coding	1.15096	8.1e-05	0.00182
TAS2R43	ENSG00000255374.2	coding	1.15105	0.000348	0.00598
C4orf51	ENSG00000237136.5	coding	1.15506	0.0004	0.0066
PMCH	ENSG00000183395.4	coding	1.15532	0.000106	0.00227
HYAL4	ENSG00000106302.8	coding	1.15769	0.00148	0.0171
GPR139	ENSG00000180269.7	coding	1.16319	0.000149	0.00298
HIST1H2BB	ENSG00000276410.2	coding	1.16538	0.000133	0.00272
CHIA	ENSG00000134216.17	coding	1.16588	0.00137	0.0161
SLC17A1	ENSG00000124568.9	coding	1.16779	9.02e-05	0.00199
IZUMO2	ENSG00000161652.11	coding	1.18082	0.00032	0.0056
ACCSL	ENSG00000205126.2	coding	1.18416	0.000997	0.0132
TBATA	ENSG00000166220.11	coding	1.19946	0.000443	0.00715
NXPE1	ENSG00000095110.6	coding	1.19981	0.000851	0.0118
FOXE1	ENSG00000178919.8	coding	1.20613	0.000304	0.00537
SCGB3A2	ENSG00000164265.7	coding	1.2123	1.18e-05	0.000419
DSPP	ENSG00000152591.11	coding	1.21403	0.00043	0.00698
IGLL1	ENSG00000128322.6	coding	1.21526	7.3e-05	0.00166
ANKRD20A3	ENSG00000276203.3	coding	1.21979	0.000651	0.00979
TMPRSS11D	ENSG00000153802.10	coding	1.22129	0.000716	0.0102
MOGAT3	ENSG00000106384.9	coding	1.22679	0.000188	0.00365
HMHB1	ENSG00000158497.2	coding	1.23215	1.8e-05	0.000554
DEFB124	ENSG00000180383.3	coding	1.24313	2.31e-05	0.000663
ZNF177	ENSG00000188629.10	coding	1.24822	6.47e-06	0.000274
SLC35D3	ENSG00000182747.4	coding	1.25277	2.48e-05	0.000702
RBPJL	ENSG00000124232.9	coding	1.2975	3.48e-05	0.000935
MS4A2	ENSG00000149534.7	coding	1.30663	0.000105	0.00227
DSC3	ENSG00000134762.15	coding	1.30707	0.000194	0.00374
TBX10	ENSG00000167800.9	coding	1.30982	2.51e-05	0.000706
IGSF23	ENSG00000216588.7	coding	1.33519	6.31e-06	0.00027
ZNF729	ENSG00000196350.8	coding	1.3966	4.27e-06	0.000205
TAS2R50	ENSG00000212126.3	coding	1.41691	2.06e-06	0.000113
CYP1A2	ENSG00000140505.6	coding	1.42898	1.29e-05	0.000446
KRT20	ENSG00000171431.3	coding	1.64	3.06e-09	5.55e-07
VAV3-AS1	ENSG00000230489.1	lncRNA	-1.22615	2.31e-12	1.31e-09
LINC00552	ENSG00000279770.1	lncRNA	-1.08244	2.39e-09	4.41e-07
LINC00589	ENSG00000251191.6	lncRNA	-1.00492	1.13e-06	6.54e-05
MYO16-AS1	ENSG00000236242.1	lncRNA	1.00041	3.53e-05	0.000943
HOXB-AS3	ENSG00000233101.9	lncRNA	1.00568	1.74e-05	0.000551
LINC00592	ENSG00000258279.2	lncRNA	1.02326	7.81e-05	0.00176
FAM138B	ENSG00000226516.6	lncRNA	1.0378	0.000176	0.00347
LINC00523	ENSG00000196273.6	lncRNA	1.07471	0.000635	0.0097
LGALS8-AS1	ENSG00000223776.5	lncRNA	1.08225	5.53e-05	0.00131
LRRC2-AS1	ENSG00000268324.2	lncRNA	1.11808	0.00127	0.0153
LINC00668	ENSG00000265933.4	lncRNA	1.12322	0.00228	0.0239
NTRK3-AS1	ENSG00000260305.1	lncRNA	1.1916	0.00369	0.0338
LINC00544	ENSG00000122043.9	lncRNA	1.19568	0.00215	0.0229
DLG1-AS1	ENSG00000227375.4	lncRNA	1.19632	0.00146	0.0169
NAV2-AS4	ENSG00000254622.1	lncRNA	1.20571	0.00189	0.0208
RNF216-IT1	ENSG00000237738.1	lncRNA	1.21667	0.00162	0.0185
FAM157B	ENSG00000233013.7	lncRNA	1.21691	0.00146	0.0169
PWRN1	ENSG00000259905.4	lncRNA	1.22495	0.00422	0.0373
LINC00311	ENSG00000179219.5	lncRNA	1.23137	0.00178	0.0198
DPYD-AS1	ENSG00000232878.2	lncRNA	1.23852	0.00215	0.0229
TBX5-AS1	ENSG00000255399.3	lncRNA	1.24576	0.00108	0.0142
BRWD1-AS1	ENSG00000238141.2	lncRNA	1.26851	0.0031	0.0298
MIR31HG	ENSG00000171889.3	lncRNA	1.28389	0.00307	0.0296
TTTY10	ENSG00000229236.1	lncRNA	1.03093	0.0034	0.0318
LINC00381	ENSG00000226240.1	lncRNA	1.04462	0.00216	0.023
FRMD6-AS2	ENSG00000258537.4	lncRNA	1.05885	0.00193	0.0211
FAM41C	ENSG00000230368.2	lncRNA	1.06719	0.00344	0.0321
LINC00494	ENSG00000235621.7	lncRNA	1.09419	0.00213	0.0228
LINC00032	ENSG00000231459.1	lncRNA	1.11441	0.000264	0.00478
TCL6	ENSG00000187621.13	lncRNA	1.1681	0.000403	0.00662
MEIS1-AS3	ENSG00000226819.1	lncRNA	1.31265	1.43e-05	0.000484
OPA1-AS1	ENSG00000224855.4	lncRNA	1.32685	6.92e-06	0.000292
LINC00626	ENSG00000225826.1	lncRNA	1.53064	1.71e-07	1.28e-05
