# Supplementary material for: An eight-mRNA signature outperforms the lncRNA-based signature in predicting prognosis of patients with glioblastoma
Source: BMC Med Genet. 2020 Mar 19;21:56. doi: 10.1186/s12881-020-0992-7 (PMC7081624; doi:10.1186/s12881-020-0992-7)
Supplement: Supplementary file 2 — Additional file 2. [file 12881_2020_992_MOESM2_ESM.xlsx]

## Sheet: Sheet1
status	Pvalue	FDR	logFC
DEFB124	8.75e-06	0.00301323	-0.569504
HMHB1	5e-06	0.00172238	-0.546856
SIM1	4.95e-05	0.0170491	-0.465061
MAGEA8	5.15e-05	0.017734	-0.456841
PRDM14	4.53e-05	0.0156074	-0.455668
KIR3DL1	3.42e-05	0.0117874	-0.455179
HSD17B2	5.43e-05	0.0187063	-0.432025
DSPP	6.67e-05	0.0229635	-0.34011
MAGEC2	3.57e-05	0.0123049	-0.309095
MAGEA6	7.79e-05	0.0268163	-0.30175
LDHAL6B	7.24e-05	0.0249167	-0.272765
ASPG	6.52e-05	0.0224612	0.263369
KCNG3	5.25e-05	0.0180695	0.263398
OR13J1	1.17e-05	0.00403746	0.264008
VN1R2	2.25e-05	0.00773372	0.264657
SPIN2A	2.29e-05	0.00788348	0.266045
KRT23	3.57e-06	0.00122898	0.266306
C12orf71	5.27e-05	0.0181534	0.267697
VNN3	2.71e-06	0.000934188	0.268154
PKHD1L1	2.96e-05	0.0101889	0.268538
CHRNA2	1.13e-06	0.00039016	0.268653
GLP1R	1.4e-05	0.0048268	0.270435
OCSTAMP	2.77e-05	0.00954465	0.271282
SPIB	4.28e-08	1.475e-05	0.271757
KCNJ13	6.72e-05	0.0231261	0.272105
PABPC1L2B	3.49e-05	0.0120039	0.272285
LCN15	2.51e-05	0.00865273	0.273358
TMEM215	4.64e-05	0.0159733	0.274452
SOHLH1	2.76e-05	0.0094962	0.274588
TKTL2	0.000125	0.0430395	0.275303
RNF151	1.32e-05	0.00454103	0.275368
MMP10	6.79e-06	0.00233667	0.277499
CLDN19	0.000119	0.0408725	0.2775
GJB4	4.94e-05	0.0170105	0.278328
STRA8	0.000141	0.0486186	0.279777
WDR64	6.67e-07	0.000229807	0.280437
ENPP7	4.41e-05	0.0151814	0.280506
ACTL8	0.000119	0.0410435	0.280628
CCL13	6.61e-05	0.0227722	0.281063
KLK10	2.71e-07	9.32e-05	0.283516
SYT8	3.75e-05	0.0129161	0.284099
LHFPL5	4.91e-05	0.016906	0.286119
OBP2A	7.25e-05	0.024981	0.28628
RBM46	1.86e-06	0.000639144	0.28633
RS1	3.15e-06	0.00108348	0.287702
C8orf86	7.44e-05	0.0256075	0.287992
TPSG1	5.37e-06	0.00185025	0.288553
PROZ	3.54e-06	0.00121921	0.293648
ELF5	3.15e-07	0.000108529	0.294705
KCNB2	3.56e-05	0.0122446	0.295333
C9	0.000115	0.0394756	0.295578
WNT8B	3.13e-05	0.0107741	0.296209
ALOX12B	1.06e-06	0.000364878	0.296979
HCAR3	4.65e-06	0.00160163	0.297381
MAT1A	3.67e-05	0.0126257	0.297542
ANKRD30B	9.07e-05	0.0312451	0.2998
CNGB1	8.51e-07	0.000293213	0.30036
PGLYRP1	7.05e-07	0.000242882	0.300545
MEIOB	6.46e-05	0.0222367	0.301623
FFAR1	4.66e-05	0.0160315	0.301703
TREML4	3e-05	0.0103414	0.302238
FAM153C	1.63e-05	0.00561323	0.302344
TH	2.57e-06	0.000885685	0.303182
KRT222	3.12e-06	0.00107391	0.304688
TACR3	1.46e-05	0.00502015	0.304783
CALCA	8.16e-05	0.0281161	0.305168
C10orf67	3.29e-07	0.000113385	0.305469
DMRT1	1.15e-05	0.00394782	0.305821
DNAJC5G	0.000106	0.0363397	0.306845
DDX4	3.54e-05	0.0121947	0.308334
CCDC140	6.16e-05	0.0212114	0.309325
CAMP	5.97e-06	0.00205436	0.309559
SLC10A1	3.36e-05	0.011561	0.311302
FXYD4	9.94e-05	0.0342148	0.311523
STRC	1.06e-07	3.635e-05	0.31256
FCRL5	3.12e-05	0.0107286	0.312664
CYP7A1	1.24e-05	0.00427977	0.313823
LCN8	4.38e-05	0.0150671	0.31385
RESP18	0.00011	0.0378142	0.314066
ESRP1	4.17e-06	0.00143576	0.314183
ABCB11	0.000119	0.0408545	0.314349
CSRP3	4.21e-06	0.00145051	0.3156
CHAT	0.000104	0.0357691	0.315882
CALHM3	0.00014	0.048144	0.316177
RNF222	1.52e-05	0.00522837	0.316954
DRD5	4.67e-05	0.0160821	0.317082
ANKRD34C	3.05e-05	0.010516	0.317191
BMP3	0.000129	0.0443878	0.321236
MYH6	9.55e-06	0.00328731	0.321986
PNPLA5	3.83e-05	0.0131723	0.323058
CPA1	1.82e-05	0.00627203	0.323327
NMRK2	5.42e-05	0.018668	0.323468
FRG2C	2.65e-05	0.0091094	0.325047
PAEP	0.000127	0.0437972	0.325378
EPHA8	3.99e-09	1.375e-06	0.325435
GP5	1.65e-06	0.000566603	0.327141
GJD3	0.00013	0.0448799	0.327333
ASB18	0.000115	0.039599	0.327949
GALNTL5	2.41e-05	0.00830275	0.334575
WDR87	4.46e-05	0.0153611	0.334633
TSPAN19	3.37e-06	0.00116078	0.335025
LCN2	1.27e-06	0.000437458	0.337078
IRGC	6.36e-05	0.0219115	0.337142
TBC1D28	0.000103	0.0354766	0.33774
S100A7	1.16e-05	0.00398715	0.337896
ANKRD18A	2.02e-05	0.00695622	0.340157
ARL14EPL	4e-06	0.00137601	0.34207
LIPJ	1.22e-05	0.00419562	0.344229
ERN2	1.62e-06	0.000557981	0.345378
ASTL	3.02e-05	0.0103832	0.346881
UTF1	7.26e-06	0.00250099	0.347431
CLDN14	1.33e-07	4.565e-05	0.347574
ANGPTL3	5.62e-05	0.0193654	0.34803
LRRC26	0.000104	0.0358654	0.350335
HTR1A	8.13e-05	0.0279998	0.35046
GMNC	4.76e-05	0.0163849	0.351096
DEFA3	3.25e-05	0.0111764	0.352295
SCGB1A1	8.57e-05	0.0295127	0.352567
ORM1	1.89e-05	0.00650432	0.35349
IL25	4.94e-05	0.0170004	0.355069
FOXD4L3	1.48e-05	0.00511187	0.355825
TMEM114	5.1e-06	0.00175558	0.356051
LRRC52	0.000103	0.035493	0.358041
GPRIN2	9.9e-05	0.0340923	0.358729
HIGD2B	4.84e-05	0.0166657	0.359136
ENTHD1	1.57e-07	5.394e-05	0.360593
GP9	5.53e-05	0.019045	0.362052
UNCX	9.69e-05	0.0333731	0.362585
HCRT	2.75e-07	9.4589e-05	0.362604
MMP8	1.03e-05	0.00354653	0.365093
FUT5	6.62e-05	0.0227901	0.365209
EDN2	7.37e-07	0.000253768	0.371287
MUC2	0.000112	0.0384795	0.372574
DMRTC1	0.000101	0.0349056	0.372591
CELF6	1.8e-06	0.000619114	0.372734
PLA2G3	3.19e-05	0.0109763	0.372835
IL36B	1.27e-05	0.00438759	0.373965
EPS8L3	8.58e-05	0.0295363	0.374278
DSC1	2.34e-06	0.000805482	0.375627
ETV3L	1.99e-05	0.00686573	0.375699
SLC30A8	6.06e-05	0.0208809	0.375966
NEUROD6	2.07e-06	0.000712718	0.377296
OCA2	5.43e-07	0.000187073	0.377718
OR2B11	0.000112	0.0384943	0.3778
FOXD4L6	4.43e-05	0.0152577	0.379877
HSFX1	1.13e-05	0.00388253	0.38044
MUC22	0.000121	0.0416432	0.38375
NYAP2	2.97e-06	0.0010222	0.386353
APOF	9.77e-06	0.00336364	0.387786
LEP	1.14e-06	0.000392415	0.387958
PDE6H	1.48e-05	0.00508192	0.389637
TMEM89	1.8e-05	0.00619504	0.390119
LPA	7.3e-07	0.000251359	0.39255
GOLGA6A	5.21e-05	0.0179319	0.396548
SLC6A5	1.49e-05	0.00513596	0.397714
MAB21L3	8.85e-05	0.0304771	0.400302
KNCN	5.04e-06	0.0017366	0.403779
HTR6	1.48e-07	5.08e-05	0.40571
GATA5	0.000107	0.0370052	0.406731
FABP12	2.03e-05	0.00700624	0.406774
KLK7	2.11e-06	0.000727045	0.40755
EIF4E1B	2.31e-06	0.000794697	0.410216
DSG1	0.000116	0.040063	0.410434
SDR16C5	4.8e-07	0.000165269	0.411359
SYCE1	3.05e-06	0.00105062	0.411728
FADS6	4.06e-07	0.00013967	0.411972
C5orf46	3.8e-06	0.00130857	0.41453
KLHL1	1.36e-05	0.00468801	0.418169
C1QTNF8	3.22e-06	0.00110992	0.419064
CIDEA	7.97e-06	0.00274429	0.421151
ERVV-1	0.000121	0.041746	0.422081
KRT16	2.63e-08	9.05e-06	0.423798
FATE1	1.7e-05	0.00586439	0.429253
MCHR2	2.85e-05	0.00980498	0.431648
MOGAT2	5.79e-05	0.0199415	0.434874
ITLN2	2.2e-05	0.00758456	0.435956
IL36RN	7.64e-05	0.0263004	0.438161
KIF12	1.03e-05	0.00354269	0.439742
SBK2	4.98e-05	0.0171497	0.44196
KNG1	1.21e-05	0.00416178	0.442539
SLC22A25	4.17e-05	0.0143587	0.442777
FAM216B	2.16e-05	0.00744107	0.451302
VCX3A	4.3e-05	0.0148215	0.452556
WFDC10B	2.89e-05	0.00995848	0.452779
CALR3	3.93e-05	0.0135222	0.453808
CCL7	4.86e-07	0.000167412	0.454837
BPIFB1	5.29e-05	0.0182087	0.456343
RDH8	1.93e-05	0.00666154	0.457209
RFPL4B	9.94e-06	0.00342406	0.458064
BHLHA9	0.000105	0.03624	0.460085
WNT8A	5.48e-06	0.00188663	0.460969
AGXT	6.12e-07	0.000210866	0.461365
A1CF	8.6e-05	0.0296223	0.463126
CGB7	1.47e-08	5.05e-06	0.464678
KPNA7	4.91e-07	0.000168959	0.466258
ODF3	7.84e-05	0.0270144	0.471711
ANKRD33	4.89e-06	0.00168425	0.472822
GPR6	2.26e-05	0.00777888	0.474233
SLC22A13	3.48e-06	0.00119934	0.475774
DUOXA2	5.24e-05	0.0180577	0.47618
PNLIPRP3	3.35e-06	0.001152	0.479667
SERPINA12	1.94e-05	0.0066779	0.480311
LOR	2.87e-05	0.00987934	0.480738
UTS2R	3.54e-06	0.00121939	0.482173
HTR3A	8.59e-07	0.000295901	0.48321
SPERT	4.45e-05	0.0153162	0.484926
DHRS7C	1.44e-05	0.00497545	0.485555
PRKACG	1.83e-05	0.00630942	0.490641
TAS2R3	6.88e-05	0.0237069	0.493357
C22orf42	4.81e-06	0.00165492	0.494753
TPH2	3.81e-06	0.00131108	0.49713
CT62	2.76e-05	0.0095104	0.498849
CLC	2.92e-05	0.0100699	0.49974
RD3	6.76e-05	0.0232794	0.503953
MRGPRE	3.81e-06	0.00131077	0.504693
MROH9	1.11e-05	0.0038101	0.507622
SMPX	3.46e-06	0.00119027	0.510252
DKK4	6.24e-07	0.000214774	0.514897
LYZL4	3.08e-05	0.0105959	0.516061
IL17REL	9.34e-07	0.000321734	0.520813
AQP10	1.41e-05	0.00483822	0.524329
CFC1	8.25e-06	0.00284145	0.538005
GDF3	1.67e-05	0.00576249	0.548102
HTR3B	1.01e-05	0.00346527	0.55705
GGT6	3.57e-06	0.00122874	0.558974
SPATA19	3.01e-05	0.0103556	0.565274
CRLF2	7.6e-06	0.00261594	0.565694
SERPINA10	1.77e-05	0.00609622	0.570775
EDDM3A	9.41e-06	0.00323884	0.573736
SERPINB7	2.8e-05	0.00963521	0.575744
TNS4	1.8e-06	0.000620113	0.578718
FCN2	1.32e-05	0.00453997	0.580466
RAET1L	5.17e-07	0.000178198	0.582734
OR10AD1	3.66e-06	0.00125986	0.599841
CST2	1.28e-05	0.00442215	0.600838
PTPRQ	5.26e-08	1.81e-05	0.605574
COL6A5	6.99e-06	0.00240553	0.61133
GOLGA6B	8.23e-06	0.00283512	0.61923
SLC36A2	9.08e-06	0.00312554	0.628107
GPR52	1.82e-05	0.00625688	0.630635
PYDC1	1.34e-08	4.625e-06	0.635946
ANKS4B	2e-06	0.000689203	0.641958
HTR1E	4.68e-07	0.000161022	0.656759
NR0B2	2.64e-06	0.000907583	0.659264
SAA4	2.23e-07	7.6874e-05	0.661668
PRSS22	1.53e-06	0.000526043	0.667018
LMAN1L	8.26e-06	0.00284434	0.675634
CBLC	3.16e-07	0.000108757	0.676567
KRT31	6.29e-06	0.00216683	0.680914
AICDA	2.44e-06	0.000840372	0.712563
CLDN16	1.67e-12	5.75e-10	0.713637
SOST	7.94e-10	2.74e-07	0.717858
KRT32	4.85e-06	0.00167087	0.720741
TMEM244	4.71e-06	0.00162275	0.737599
BSND	4.76e-07	0.000164077	0.741687
SULT6B1	1.06e-06	0.000364534	0.744501
CYP4Z1	9.85e-07	0.000339113	0.784839
PGPEP1L	1.04e-08	3.58e-06	0.795965
SPACA3	1.41e-07	4.84e-05	0.808348
LCN9	1.51e-09	5.2e-07	0.820779
CEACAM6	1.16e-06	0.000397898	0.834265
KRT13	5.71e-07	0.00019654	0.838107
KLK5	2.9e-07	9.991e-05	0.838116
HAPLN4	9.18e-12	3.16e-09	0.894347
FGG	1.73e-10	5.95e-08	1.00852
ASIC5	6.58e-10	2.27e-07	1.22841
